# Supplementary material
Source: PubMed Central journal article supplement (PMC2689040)
Supplement: blood-2008-10-184291_1.pdf [file blood-2008-10-184291_1.pdf]

| Position          | Sequence                           | Number |
|-------------------|------------------------------------|--------|
| E1770A Sense      | GCGGCCACCATCGCCGcGTGGAAGGACGGGCTG  | 24137  |
| E1770A Anti Sense | CAGCCCGTCCTTCCACgCGGCGATGGTGGCCGC  | 24138  |
| W1771A Sense      | GCCACCATCGCCGAGgcGAAGGACGGGCTGAAC  | 24139  |
| W1771A Anti Sense | GTTCAAGCCCGTCTTCgCCTCGGCGATGGTGGC  | 24140  |
| K1772A Sense      | ACCATCGCCGAGTGGgcGGACGGGCTGAACGAG  | 24116  |
| K1772A Anti Sense | CTCGTTCAGCCCGTCCgcCCTCCTCGGCGATGGT | 24117  |
| D1773A Sense      | ATCGCCGAGTGGAAAGGcCGGGCTGAACGAGATG | 24141  |
| D1773A Anti Sense | CATCTCGTTCAGCCCGcCCTTCCACTCGGCGAT  | 24142  |
| G1774A Sense      | GCCGAGTGGAAAGGACGcGCTGAACGAGATGTGG | 24143  |
| G1774A Anti Sense | CCACATCTCGTTCAGCgCGTCTTCCACTCGGC   | 24144  |
| L1775A Sense      | GAGTGGAAAGGACGGGgcGAACGAGATGTGGGCA | 27647  |
| L1775A Anti Sense | TGCCACATCTCGTTCgCCCCGTCTTCCACTC    | 27648  |
| N1776A Sense      | TGGAAGGACGGGCTGgcCGAGATGTGGGCAGAC  | 24145  |
| N1776A Anti Sense | GTCTGCCACATCTCGgcCAGCCCGTCCTTCCA   | 24146  |
| Y1777A Sense      | AAGGACGGGCTGAACGcGATGTGGGCAGACCTC  | 26377  |
| Y1777A Anti Sense | GAGGTCTGCCACATCgCGTTCAGCCCGTCCTT   | 26378  |
| W1779A Sense      | GGGCTGAACGAGATGcgGGCAGACCTCCTGGAG  | 27643  |
| W1779A Anti Sense | CTCCAGGAGGTCTGCCcgCATCTCGTTCAGCCC  | 27644  |
| D1781A Sense      | AACGAGATGTGGGCAGcCCTCCTGGAGCTCATT  | 27645  |
| D1781A Anti Sense | AATGAGCTCCAGGAGGgcTGCCACATCTCGTT   | 27646  |
| L1783A Sense      | ATGTGGGCAGACCTCgcGGAGCTCATTGACACG  | 26882  |
| L1783A Anti Sense | CGTGTCAATGAGCTCCgcGAGGTCTGCCACAT   | 26883  |
| E1784A Sense      | TGGGCAGACCTCCTGGcGCTCATTGACACGCGC  | 30350  |
| E1784A Anti Sense | GCGCGTGTCAATGAGCgcCAGGAGGTCTGCCCA  | 30351  |
| I1786A Sense      | GACCTCCTGGAGCTCgcTGACACGCGCATGCAG  | 27653  |
| I1786A Anti Sense | CTGCATGCGCGTGTCAgcGAGCTCCAGGAGGTC  | 27654  |
| D1787A Sense      | CTCCTGGAGCTCATTGcCACGCGCATGCAGCTG  | 26884  |
| D1787A Anti Sense | CAGCTGCATGCGCGTGGcCAATGAGCTCCAGGAG | 26885  |
| T1788A Sense      | CTGGAGCTCATTGACgcGCGCATGCAGCTGCTG  | 26379  |
| T1788A Anti Sense | CAGCAGCTGCATGCGgcCGTCAATGAGCTCCAG  | 26380  |
| R1789A Sense      | GAGCTCATTGACACGgcCATGCAGCTGCTGGCC  | 27655  |
| R1789A Anti Sense | GGCCAGCAGCTGCATGgcCGTGTCAATGAGCTC  | 27656  |
| M1790A Sense      | CTCATTGACACGCGCgcGCAGCTGCTGGCCGCC  | 27657  |
| M1790A Anti Sense | GGCGGCCAGCAGCTGCgcGCGCGTGTCAATGAG  | 27658  |
| Q1791A Sense      | ATTGACACGCGCATGGCGCTGCTGGCCGCCTCC  | 26381  |
| Q1791A Anti Sense | GGAGGCGGCCAGCAGCGCCATGCGCGTGTCAAT  | 26382  |
| L1792A Sense      | GACACGCGCATGCAGgcGCTGGCCGCCCTCCTAT | 27659  |
| L1792A Anti Sense | ATAGGAGGCGGCCAGCgcCTGCATGCGCGTGTG  | 27660  |
| L1793A Sense      | ACGCGCATGCAGCTGgcGGCCGCCCTCCTATGAC | 27661  |
| L1793A Anti Sense | GTCATAGGAGGCGGCCgcCAGCTGCATGCGCGT  | 27662  |
| S1796A Sense      | CAGCTGCTGGCCGCCgcCCTATGACCTGCACCGC | 27663  |
| S1796A Anti Sense | GCGGTGCAGGTCATAGGcGGCGGCCAGCAGCTG  | 27664  |
| Y1797A Sense      | CTGCTGGCCGCCTccGCTGACCTGCACCGC     | 26383  |
| Y1797A Anti Sense | GCGGTGCAGGTCAGCggAGGCGGCCAGCAG     | 26384  |
| D1798A Sense      | CTGGCCGCCCTCCTATGcCCTGCACCGCTACTTC | 26886  |
| D1798A Anti Sense | GAAGTAGCGGTGCAGGgcCATAGGAGGCGGCCAG | 26887  |
| L1799A Sense      | GCCGCCTCCTATGACgcgCACCGCTACTTCTAC  | 26672  |
| L1799A Anti Sense | GTAGAAGTAGCGGTGcgcGTCATAGGAGGCGGC  | 26673  |
| H1800A Sense      | GCCTCCTATGACCTGgcCCGCTACTTCTACACG  | 28109  |
| H1800A Anti Sense | CGTGTAGAAGTAGCGGgcCAGGTCATAGGAGGC  | 28110  |
| Y1802A Sense      | TATGACCTGCACCGCgcCTTCTACACGGGTGCC  | 28111  |
| Y1802A Anti Sense | GGCACCCGTGTAGAAGgcGCGGTGCAGGTCATA  | 28112  |

| Position          | Sequence                            | Number |
|-------------------|-------------------------------------|--------|
| H1812W Anti Sense | GTGCTTCTCGTCGATccaGCCCAGGATCTCGGC   | 28108  |
| E1822A Sense      | CACCGCGAGCTGCCCCgGGACGTGGGGCTGGAC   | 30352  |
| E1822A Anti Sense | GTCCAGCCCCACGTCCgCGGGCAGCTCGCGGTG   | 30353  |
| H1817A Sense      | CTCATCGACGAGAAGgccCGCGAGCTGCCCGAG   | 26674  |
| H1817A Anti Sense | CTCGGGCAGCTCGCGggcCTTCTCGTCGATGAG   | 26675  |
| E1819A Sense      | GACGAGAAGCACCCGCGcGCTGCCCCGAGGACGTG | 26888  |
| E1819A Anti Sense | CACGTCCTCGGGCAGCgCGCGGTGCTTCTCGTC   | 26889  |
| H1835A Sense      | ACGGCCGAGTCCTTcGccCGGGTGACACAGCC    | 26890  |
| H1835A Anti Sense | GGCTGTGTGCACCCGggcGAAGGACTCGGCCGT   | 26891  |
| F1841A Sense      | CGGGTGCACACAGCCgcccGAGCGGGAGCTCCAC  | 26676  |
| F1841A Anti Sense | GTGGAGCTCCCCGCTCggcGGCTGTGTGCACCCG  | 26677  |
| H1846A Sense      | TTCGAGCGGGAGCTCgcCCTGCTGGGTGTCCAG   | 28460  |
| H1846A Anti Sense | CTGGACACCCAGCAGGgcGAGCTCCCGTCGAA    | 28461  |
| L1848H Sense      | CGGGAGCTCCACCTGcacGGTGTCCAGGTGCAG   | 28157  |
| L1848H Anti Sense | CTGCACCTGGACACCgtgCAGGTGGAGTCCCG    | 28158  |
| Q1856A Sense      | CAGGTGCAGCAGTTCgCGGACGTGGCCACCCGT   | 26678  |
| Q1856A Anti Sense | ACGGGTGGCCACGTCCgcGAACTGCTGCACCTG   | 26679  |
| T1860A Sense      | TTCCAGGACGTGGCCgCCCGTCTGCAGACAGCA   | 30354  |
| T1860A Anti Sense | TGCTGTCTGCAGACGGGcGGCCACGTCTTGAA    | 30355  |
| T1864A Sense      | GCCACCCGTCTGCAGgCAGCATATGCTGGGGAG   | 30356  |
| T1864A Anti Sense | CTCCCCAGCATATGCTGcCTGCAGACGGGTGGC   | 30357  |
| Q1886A Sense      | GTGTCTGCCCGGTGGgcGGCGCTGCTCGATGCC   | 26894  |
| Q1886A Anti Sense | GGCATCGAGCAGCGCCgcCCACGCGGCAGACAC   | 26895  |
| A1867P Sense      | CTGCAGACAGCATATcCTGGGGAGAAGGCAGAG   | 28458  |
| A1867P Anti Sense | CTCTGCCTTCTCCCCAGgATATGCTGTCTGCAG   | 28459  |
| E1869A Sense      | ACAGCATATGCTGGGGcGAAGGCAGAGGCCATC   | 26892  |
| E1869A Anti Sense | GATGGCCTCTGCCTTCgCCCCAGCATATGCTGT   | 26893  |
| E1880A Sense      | CAGAACAAGGAGCAGGcGGTGTCTGCCGCGTGG   | 26681  |
| E1880A Anti Sense | CCACGCGGCAGACACCgCCTGCTCCTTGTCTG    | 26682  |
| A1884V Sense      | CAGGAGGTGTCTGCCgtGTGGCAGGCGTGTCTC   | 24121  |
| A1884V Anti Sense | GAGCAGCGCCTGCCACaCGGCAGACACCTCCTG   | 24122  |
| Q1886A Sense      | GTGTCTGCCCGGTGGgcGGCGCTGCTCGATGCC   | 26894  |
| Q1886A Anti Sense | GGCATCGAGCAGCGCCgcCCACGCGGCAGACAC   | 26895  |
