# Supplementary material
Source: PubMed Central journal article supplement (PMC2689040)
Supplement: blood-2008-10-184291_2.pdf [file blood-2008-10-184291_2.pdf]

| <b>Mutation</b>     | <b>MutationLocus</b> | <b>Ankyrin binding</b> |  | <b>Mutation</b>   | <b>Locus</b> | <b>Ankyrin binding</b> |
|---------------------|----------------------|------------------------|--|-------------------|--------------|------------------------|
| wt $\beta$ I-14,15  | ---                  | 1.00±0.00              |  | Y1797A            | 14,15 link   | ≈ 1                    |
| wt $\alpha$ I-14,15 | ---                  | 0.00±0.00              |  | D1798A            | 14,15 link   | ≈ 1                    |
| E1770A              | h14C                 | ≈ 1                    |  | L1799A            | h15A         | ≈ 1                    |
| W1771A              | h14C                 | ≈ 1                    |  | H1800A            | h15A         | ≈ 1                    |
| K1772A              | h14C                 | ≈ 1                    |  | Y1802A            | h15A         | 0.15±0.09              |
| D1773A              | h14C                 | ≈ 1                    |  | L1812W            | h15A         | 0.90±0.05              |
| G1774A              | h14C                 | ≈ 1                    |  | L1812W,<br>L1848H | h15A         | 0.09±0.27              |
| L1775A              | h14C                 | ≈ 1                    |  | H1817A            | h15A         | ≈ 1                    |
| N1776A              | h14C                 | ≈ 1                    |  | E1819A            | A,B loop     | 0.76±0.01              |
| E1777A              | h14C                 | ≈ 1                    |  | E1822A            | A,B loop     | ≈ 1                    |
| W1779R              | h14C                 | 0.01±0.01              |  | H1835A            | h15B         | ≈ 1                    |
| D1781A              | h14C                 | 0.02±0.03              |  | F1841A            | h15B         | ≈ 1                    |
| L1783A              | h14C                 | ≈ 1                    |  | H1846A            | h15B         | ≈ 1                    |
| E1784A              | h14C                 | ≈ 0                    |  | Q1856A            | h15B         | ≈ 1                    |
| I1786A              | h14C                 | 0.18±0.13              |  | T1860A            | h15B         | ≈ 1                    |
| D1787A              | h14C                 | 0.43±0.07              |  | T1864A            | h15B         | ≈ 0                    |
| T1788A              | h14C                 | 0.01±0.02              |  | Y1866A            | B-C loop     | 0.00±0.01              |
| M1790A              | h14C                 | 0.58±0.15              |  | A1867P            | B-C loop     | 0.00±0.01              |
| Q1791A              | h14C                 | ≈ 1                    |  | E1869A            | B-C loop     | ≈ 1                    |
| L1792A              | h14C                 | 0.15±0.06              |  | E1880A            | h15C         | ≈ 1                    |
| L1793A              | 14,15 link           | 0.04±0.06              |  | A1884V            | h15C         | ≈ 1                    |
| S1796A              | 14,15 link           | 0.14±0.05              |  | Q1886A            | h15C         | ≈ 1                    |

Ankyrin binding values estimated relative to wt peptide binding, as measured from Coomassie blue stained gels or Western blot. Where no SD is expressed, values were estimated but not quantitatively measured.
