# Supplementary material
Source: PubMed Central journal article supplement (PMC2689040)
Supplement: blood-2008-10-184291_3.pdf [file blood-2008-10-184291_3.pdf]

| <b>Crystal</b>                            | <b>Native</b>              | <b>Se-met (Peak)</b>       |
|-------------------------------------------|----------------------------|----------------------------|
| Space group                               | F222                       | F222                       |
| Cell dimensions (Å)                       | $a=74.9, b=111.9, c=128.3$ | $a=75.1, b=111.6, c=128.1$ |
| <b>Data collection</b>                    |                            |                            |
| Resolution limit (Å)                      | 40.00-2.10                 | 40.00-2.60                 |
| Wavelength (Å)                            | 0.9793                     | 0.9793                     |
| Unique reflections                        | 15,692                     | 8,450                      |
| Completeness (overall / last shell; %)    | 99.2 (96.3)                | 100.0 (100.0)              |
| $R_{\text{sym}}$ (overall / last shell)   | 0.08 (0.52)                | 0.13 (0.91)                |
| $I/\sigma I$ (overall / last shell)       | 33.0 (3.0)                 | 26.0 (2.0)                 |
| Redundancy (overall / last shell)         | 11.5 (6.3)                 | 12.5 (7.3)                 |
| <b>Phasing</b>                            |                            |                            |
| Number of Se-sites                        |                            | 3                          |
| Initial FOM                               |                            | 0.29                       |
| FOM after density modification            |                            | 0.58                       |
| <b>Refinement</b>                         |                            |                            |
| Average B-factor (Å <sup>2</sup> )        | 58.4                       |                            |
| Number of atoms (protein)                 | 1,531                      |                            |
| Number of solvent molecules               | 141                        |                            |
| $R_{\text{cryst}}$ ( $ F  > 0\sigma$ ; %) | 21.0                       |                            |
| $R_{\text{free}}$ ( $ F  > 0\sigma$ ; %)  | 25.2                       |                            |
| R.m.s. deviations from ideality           |                            |                            |
| Bond lengths (Å)                          | 0.007                      |                            |
| Bond angles (°)                           | 0.860                      |                            |
